# Supplementary material for: Synthesis of novel natural product-like diaryl acetylenes as hypoxia inducible factor-1 inhibitors and antiproliferative agents
Source: Royal Society of Chemistry journal article supplement (doi:10.1039/c9ra02525a), 2019-01-01

## **Synthesis of Novel Natural Product-Like Diaryl Acetylenes as Hypoxia-Inducible Factor 1 Inhibitors and Antiproliferative Agents**

Shisheng Wang,<sup>†, ‡</sup> Liqiang Liu,<sup>†</sup> Xiuhan Guo,<sup>†, ‡</sup> Guangzhe Li,<sup>\*, †, ‡</sup> Xu Wang,<sup>†</sup>  
Huijuan Dong,<sup>†</sup> Yueqing Li<sup>†, ‡</sup> and Weijie Zhao<sup>†, ‡</sup>

<sup>†</sup>Department of Pharmacy, School of Chemical Engineering, Dalian University of Technology, Dalian  
116023, China

<sup>‡</sup>State Key Laboratory of Fine Chemicals, Dalian University of Technology, Dalian 116023, China

## **Supporting Information**

### **Characterization Data of Synthesized Key Compounds**

### <sup>1</sup>H NMR Spectra of Compound **1a**

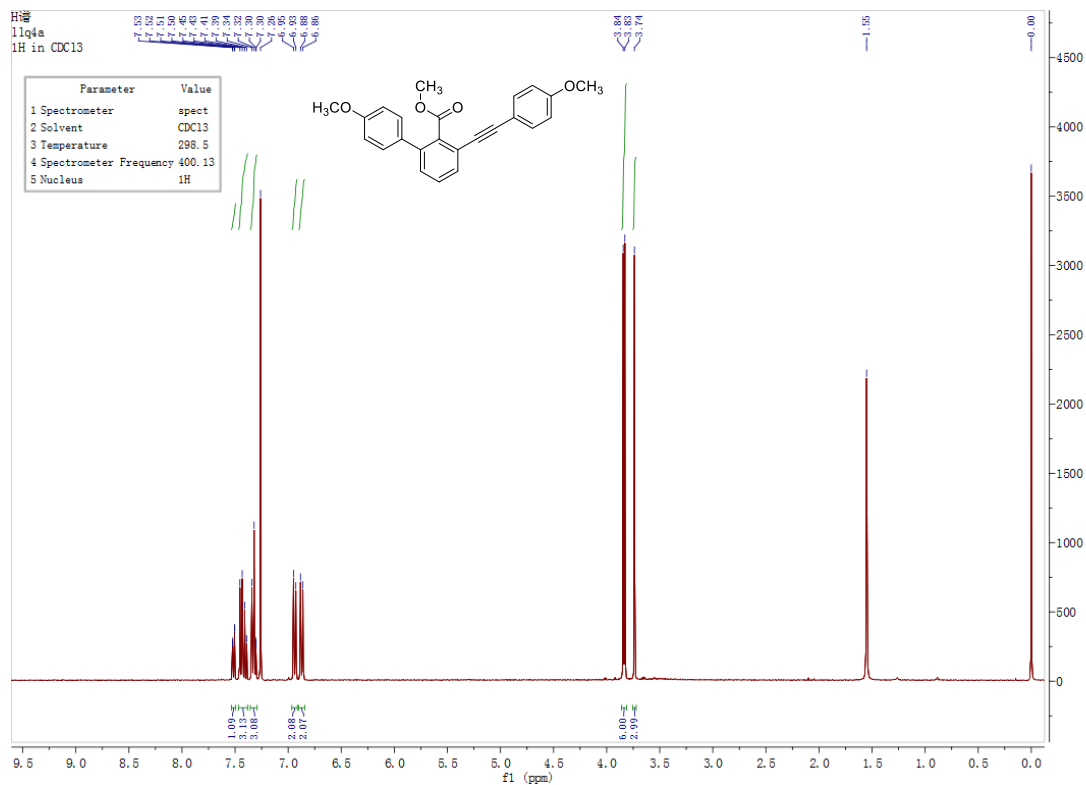

### <sup>13</sup>C NMR Spectra of Compound **1a**

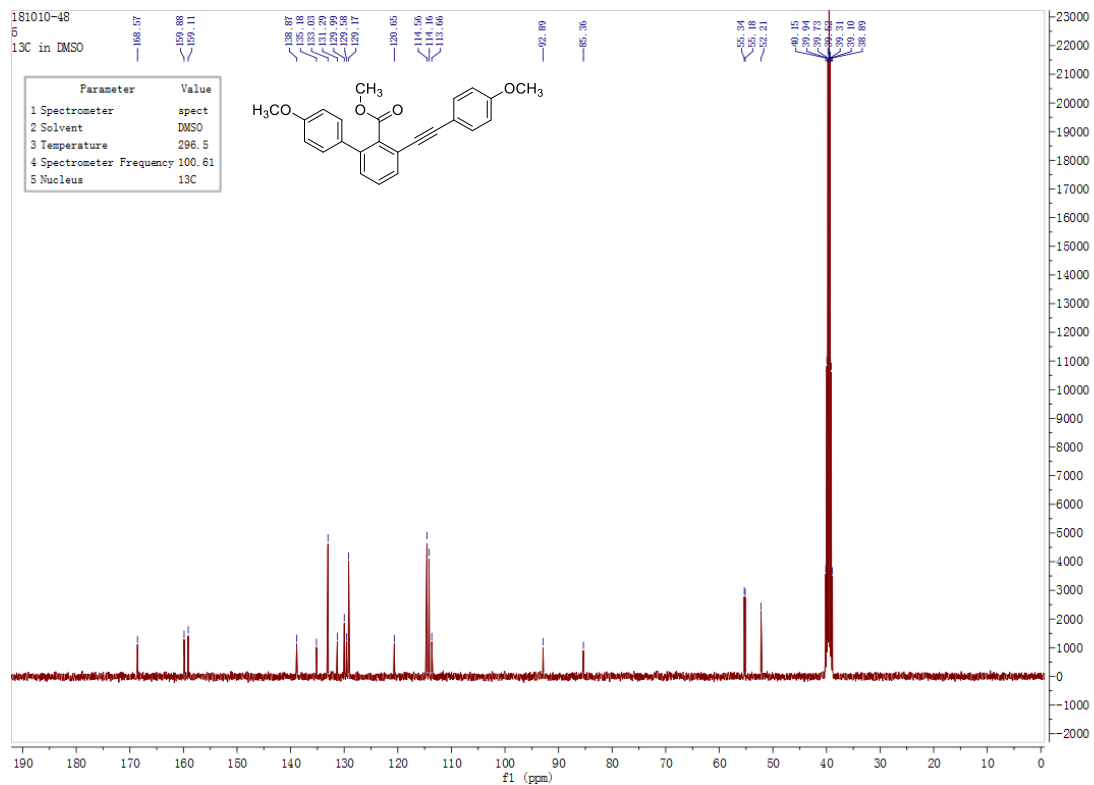

### <sup>1</sup>H NMR Spectra of Compound **1b**

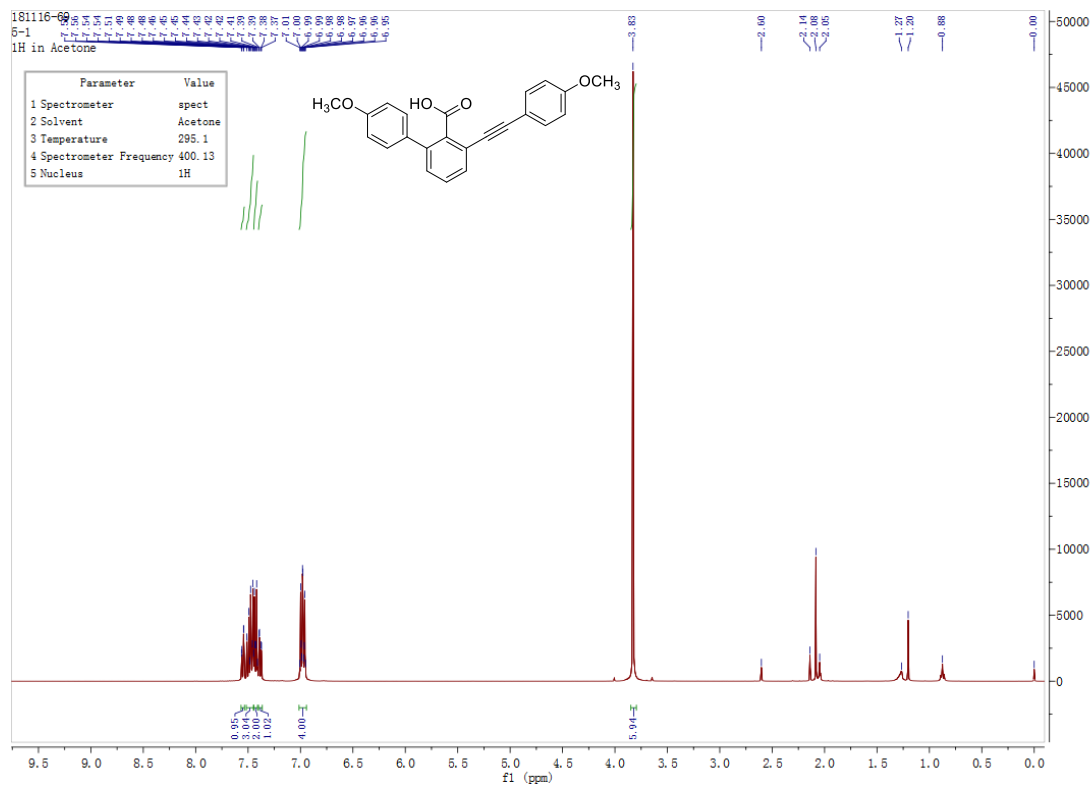

### <sup>13</sup>C NMR Spectra of Compound **1b**

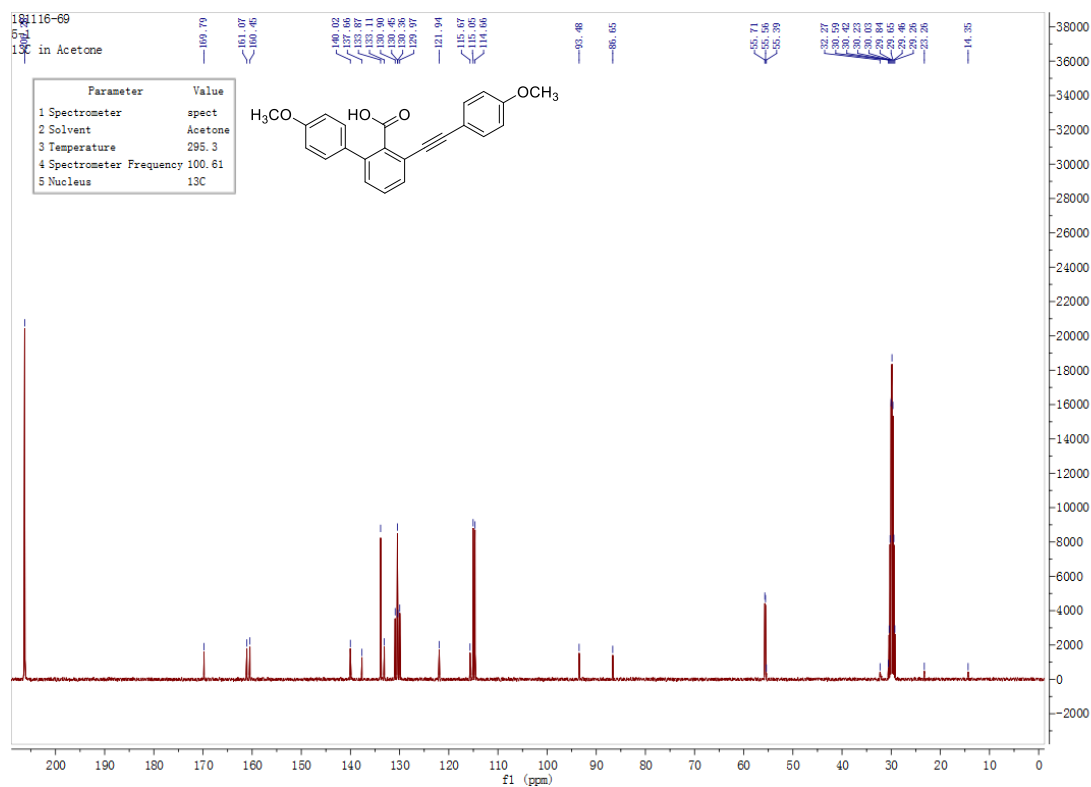

# <sup>1</sup>H NMR Spectra of Compound 1c

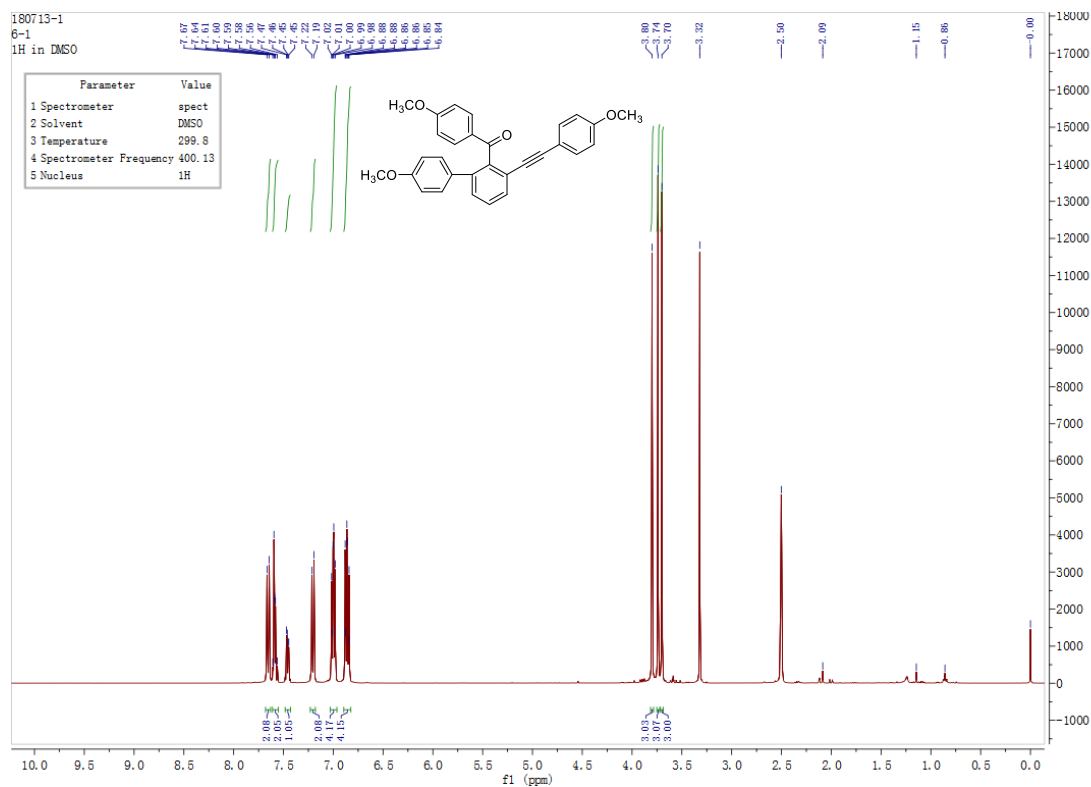

# <sup>13</sup>C NMR Spectra of Compound 1c

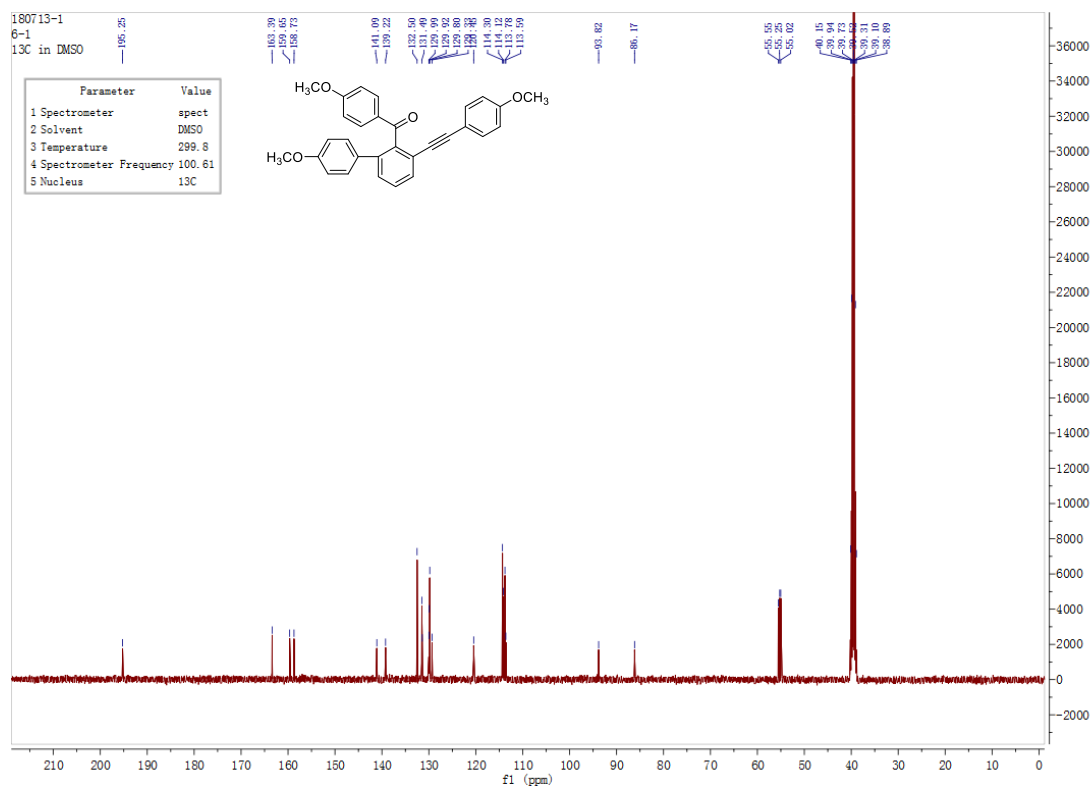

COSY of Compound **1c**

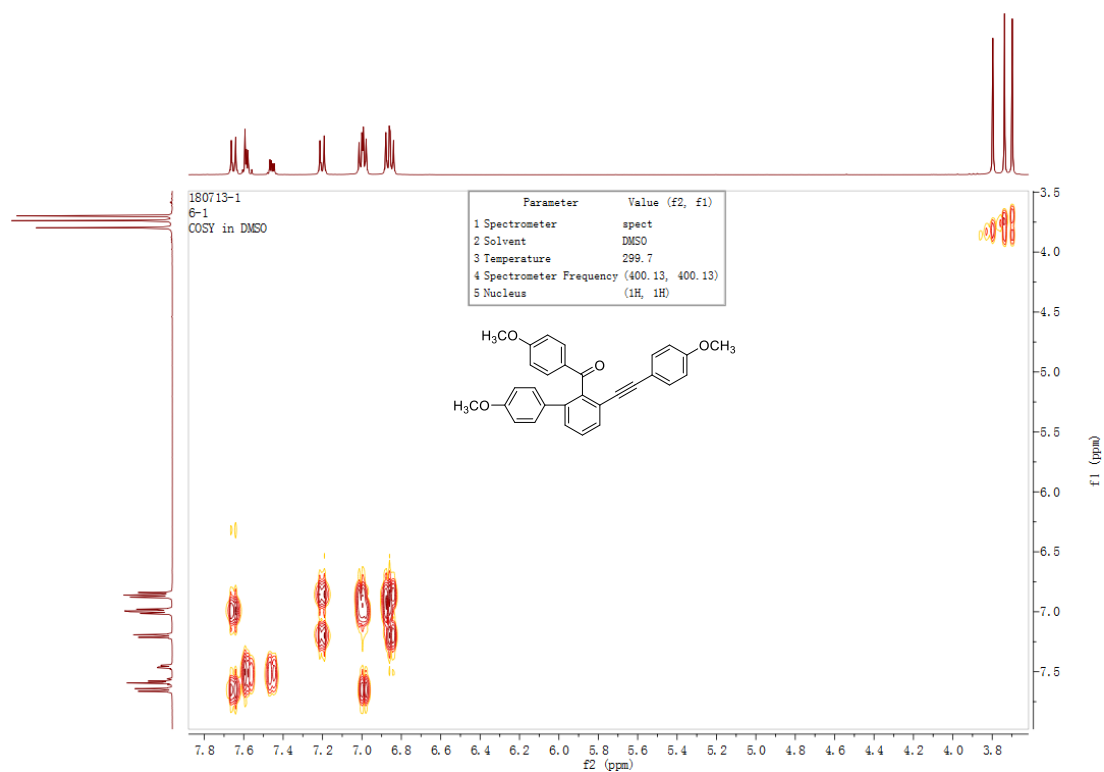

HSQC of Compound **1c**

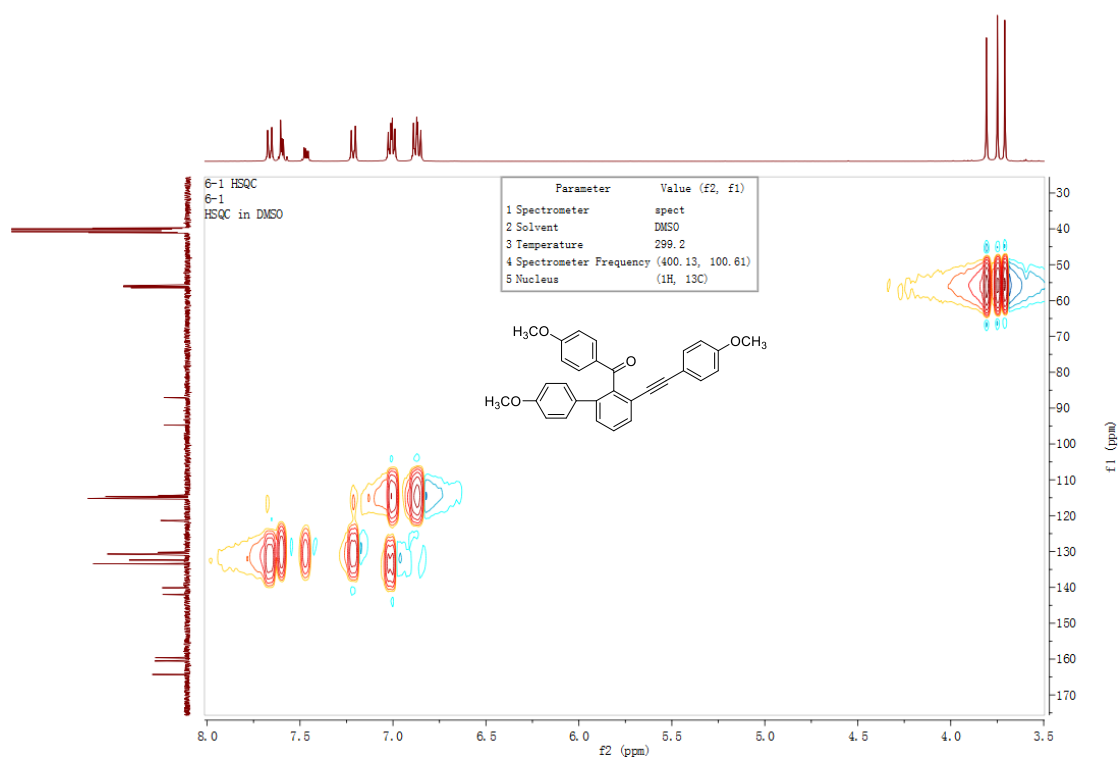

## HMBC of Compound 1c

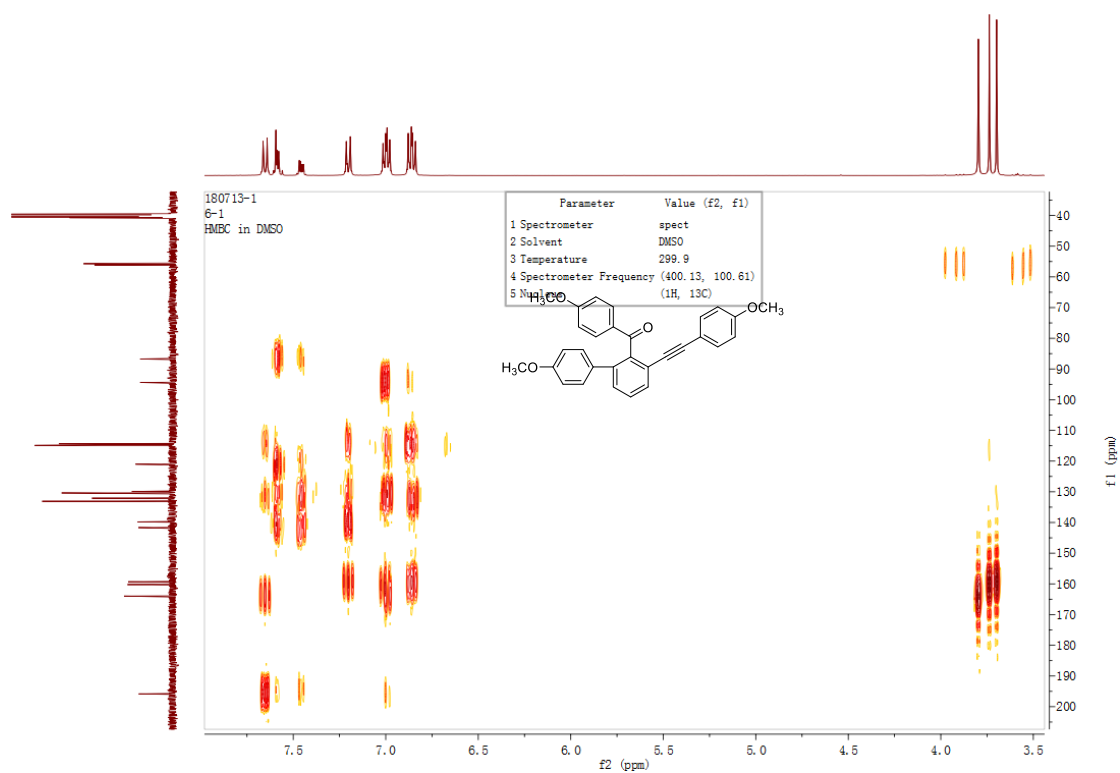

## <sup>1</sup>H NMR Spectra of Compound 1d

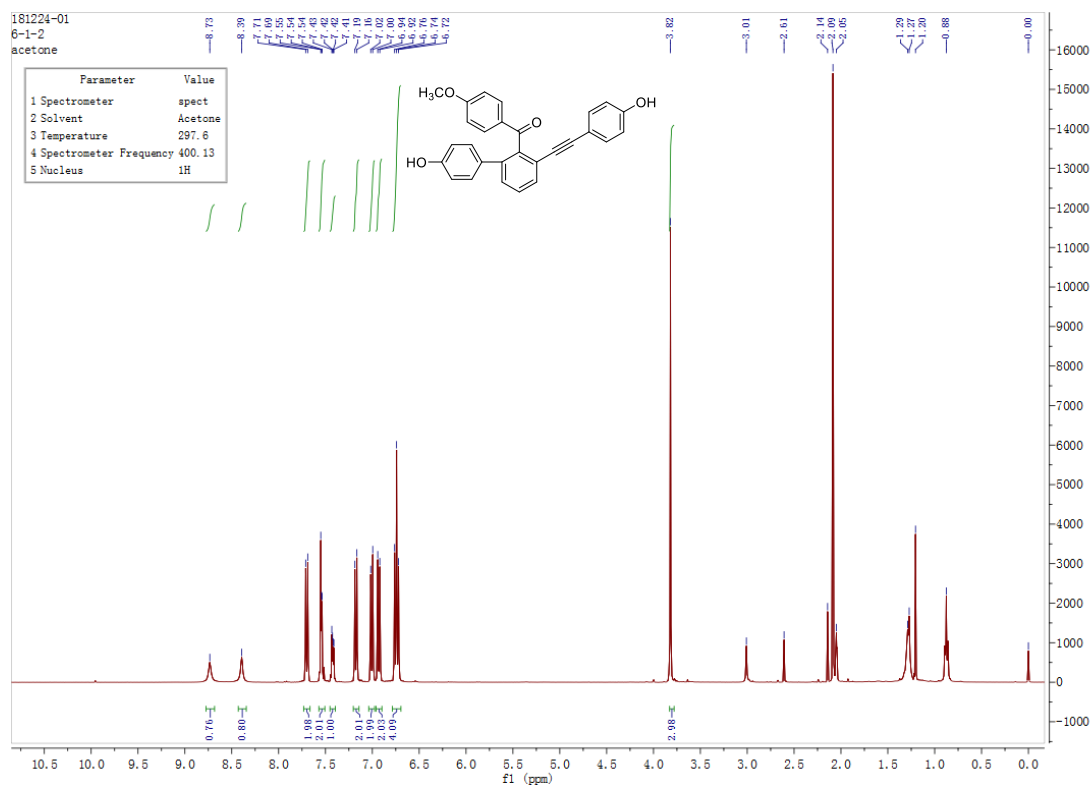

### <sup>13</sup>C NMR Spectra of Compound 1d

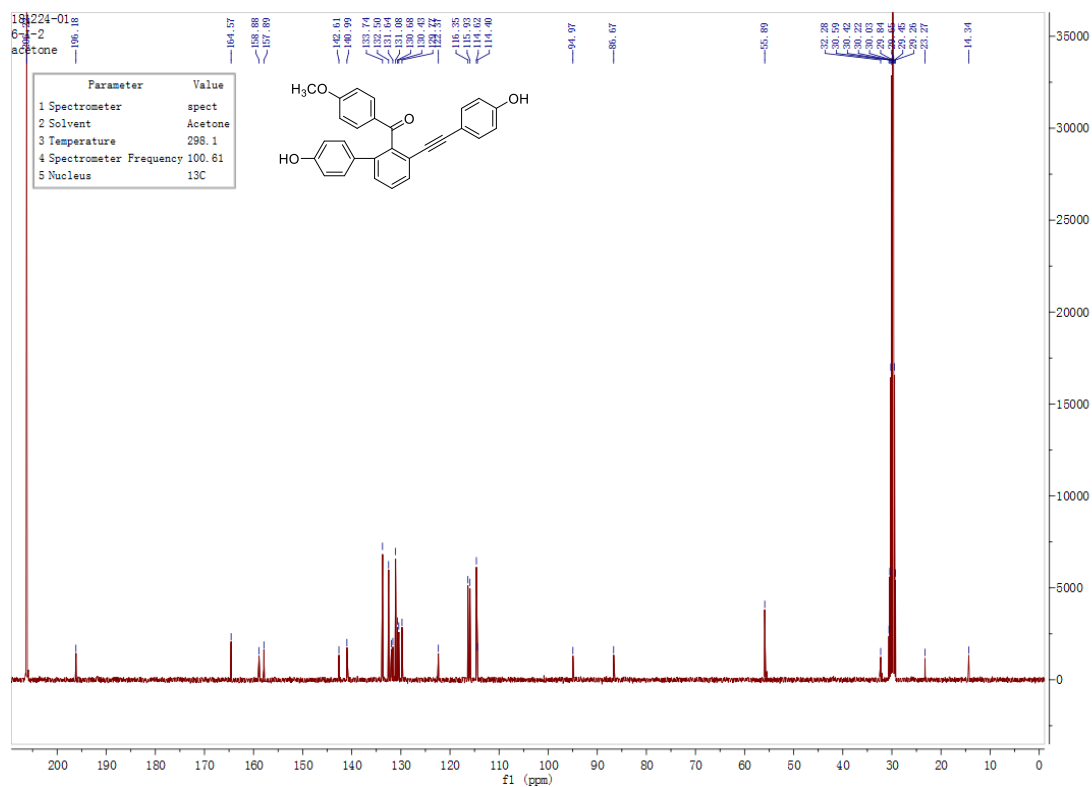

### <sup>1</sup>H NMR Spectra of Compound 1e

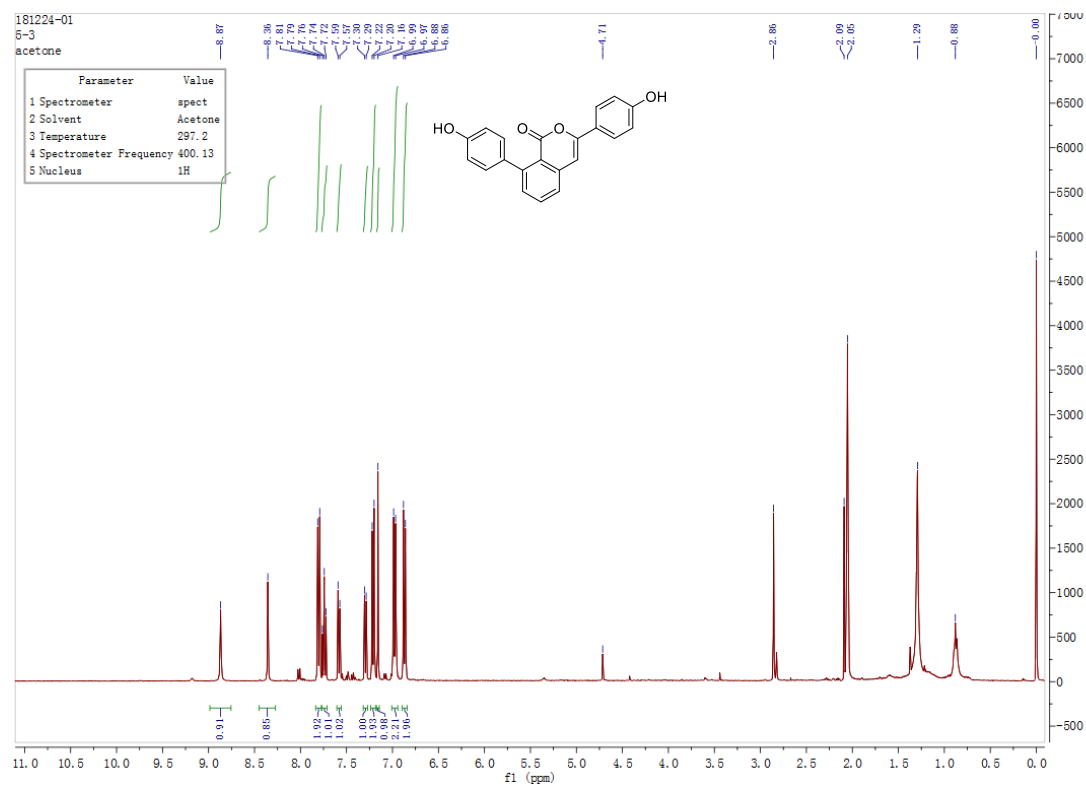

### <sup>13</sup>C NMR Spectra of Compound 1e

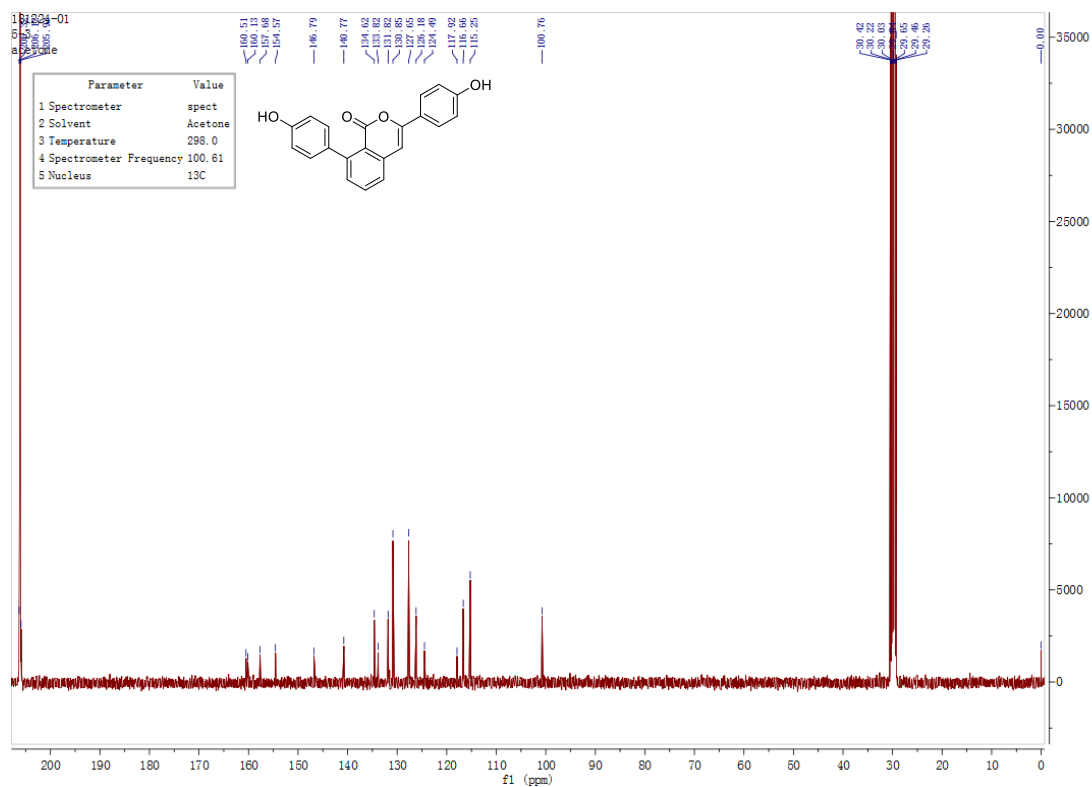

### COSY of Compound 1e

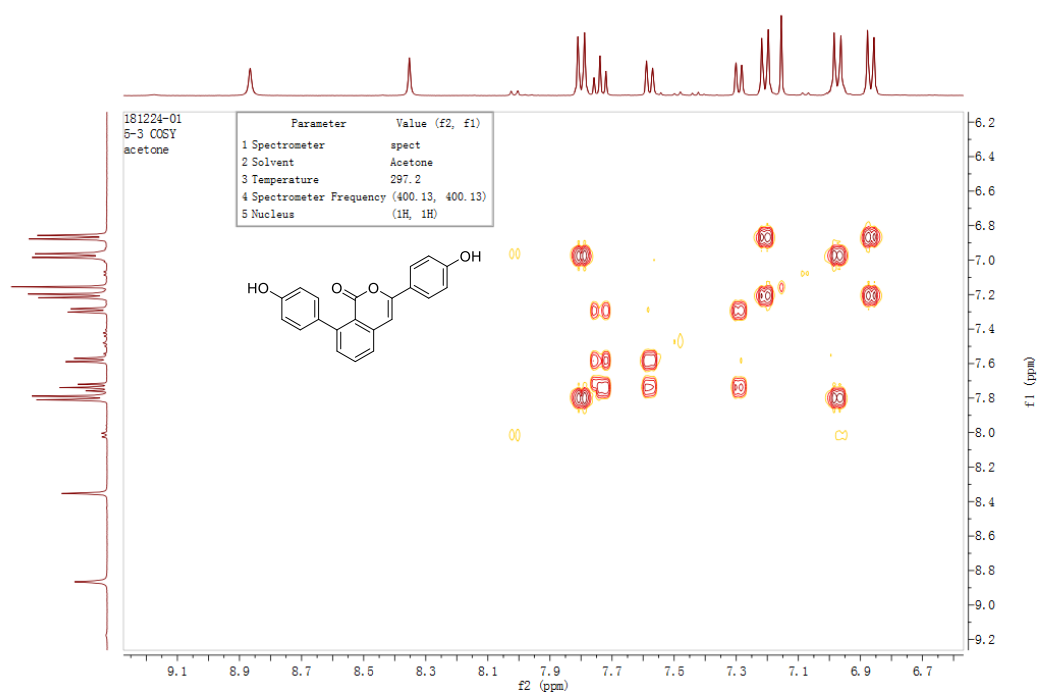



### HSQC of Compound **1e**

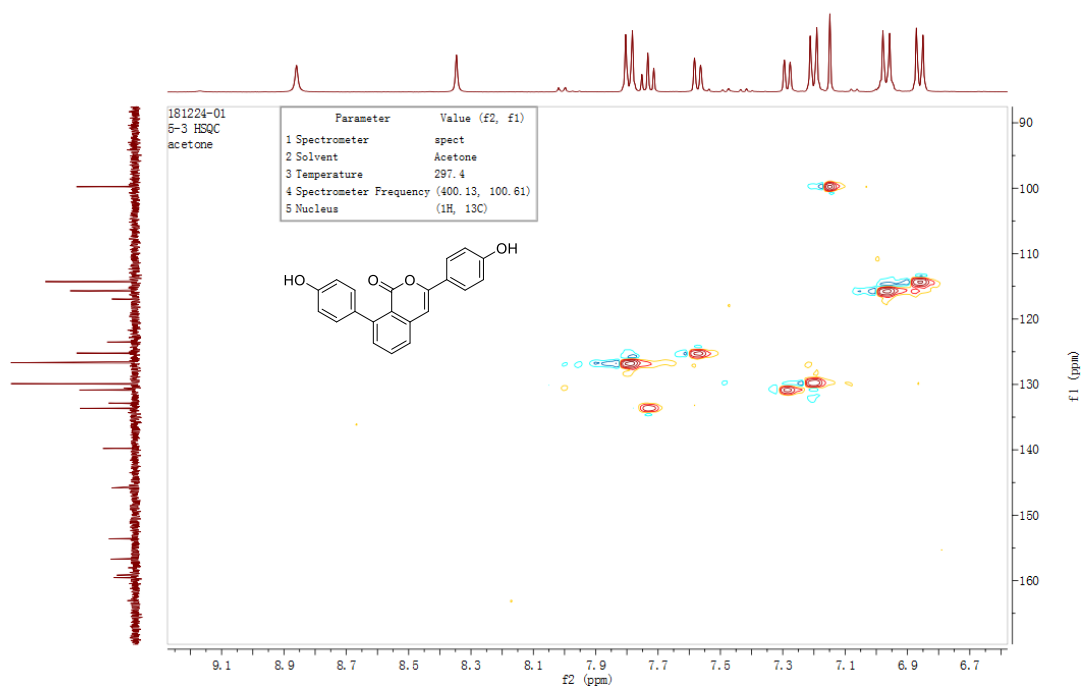

### HMBC of Compound **1e**

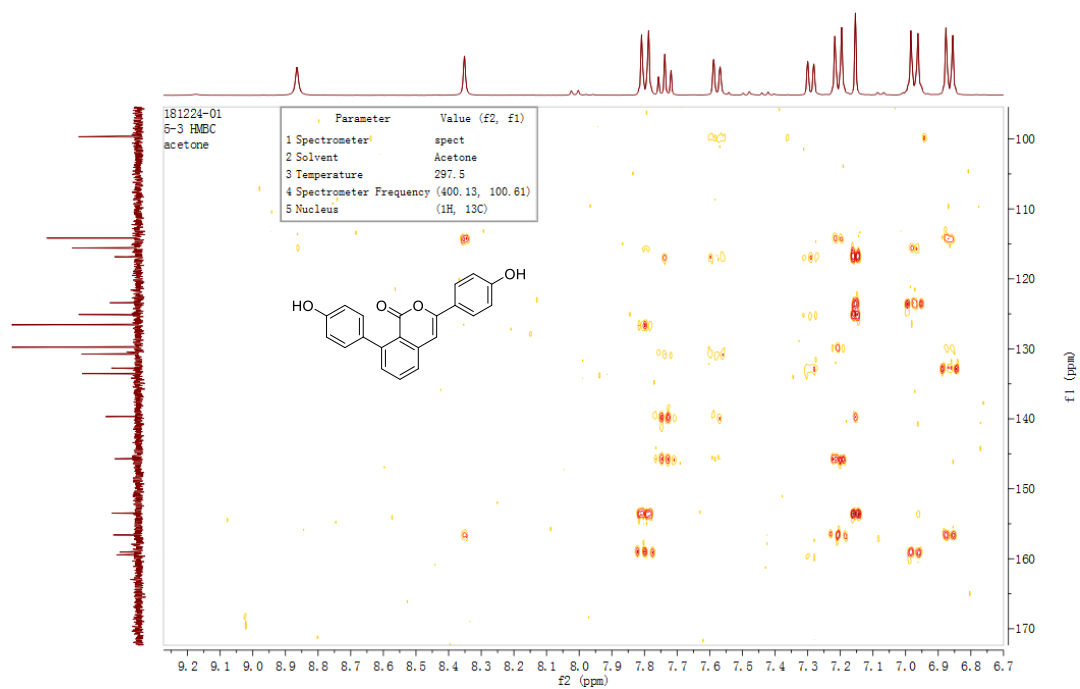

### <sup>1</sup>H NMR Spectra of Compound 2a

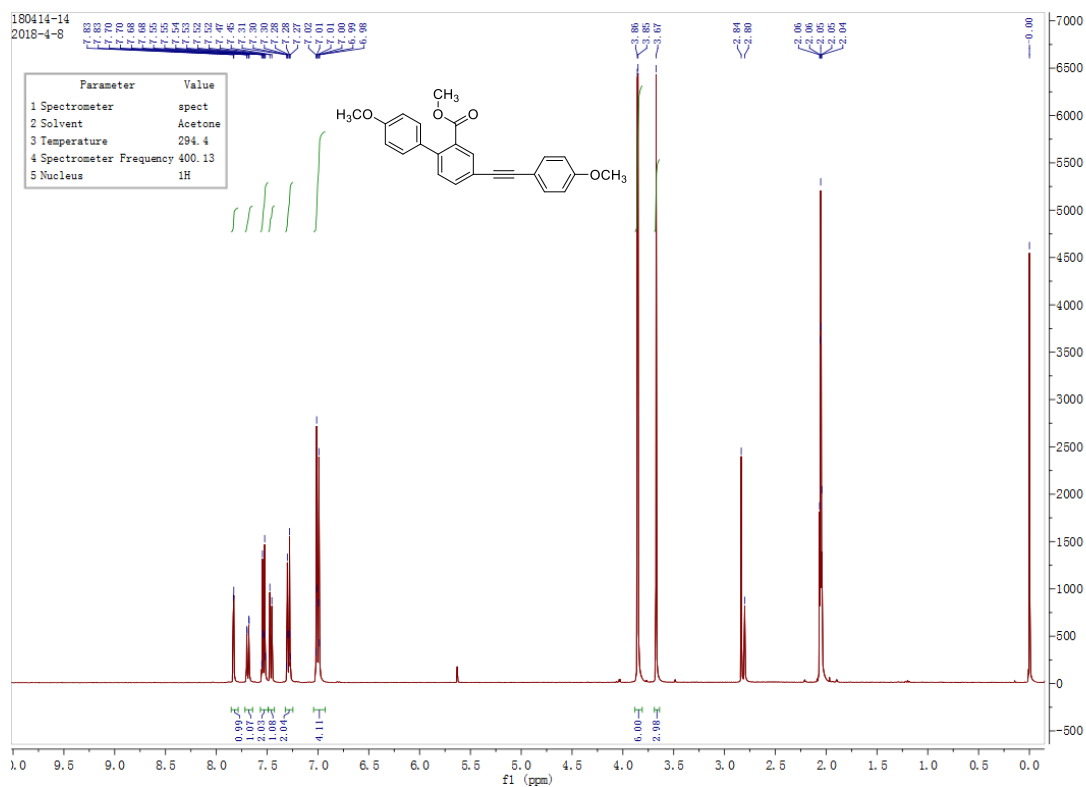

### <sup>13</sup>C NMR Spectra of Compound 2a

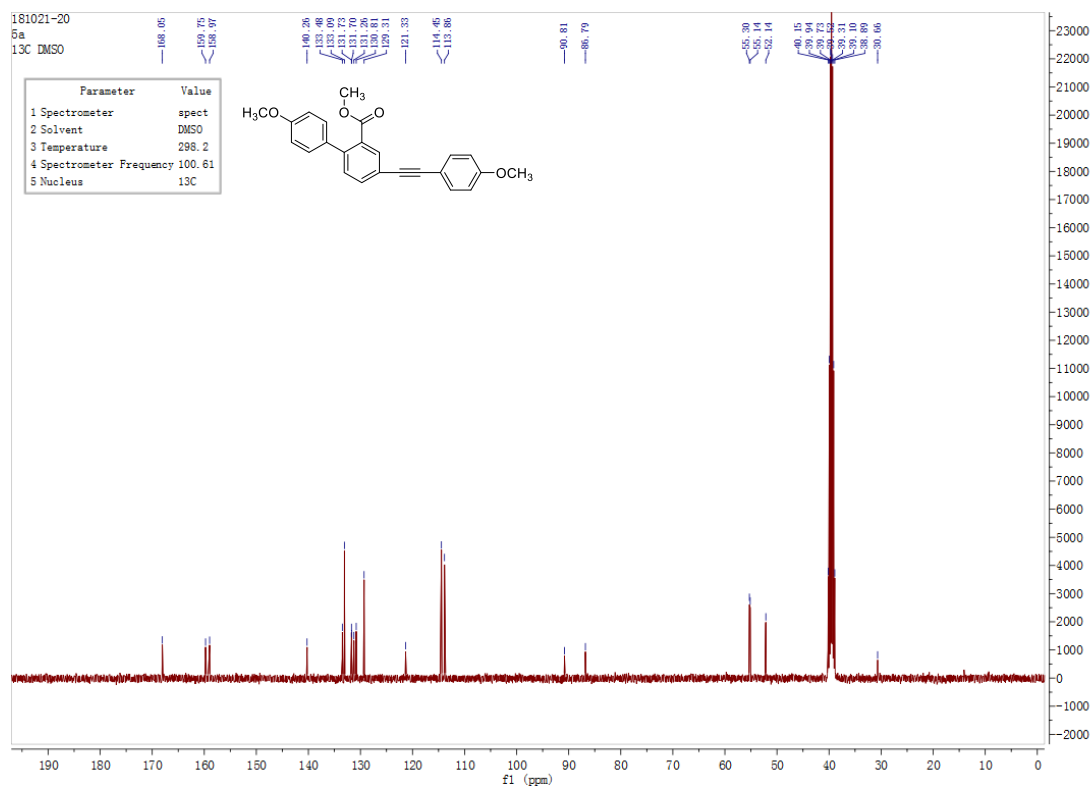

# <sup>1</sup>H NMR Spectra of Compound 2b

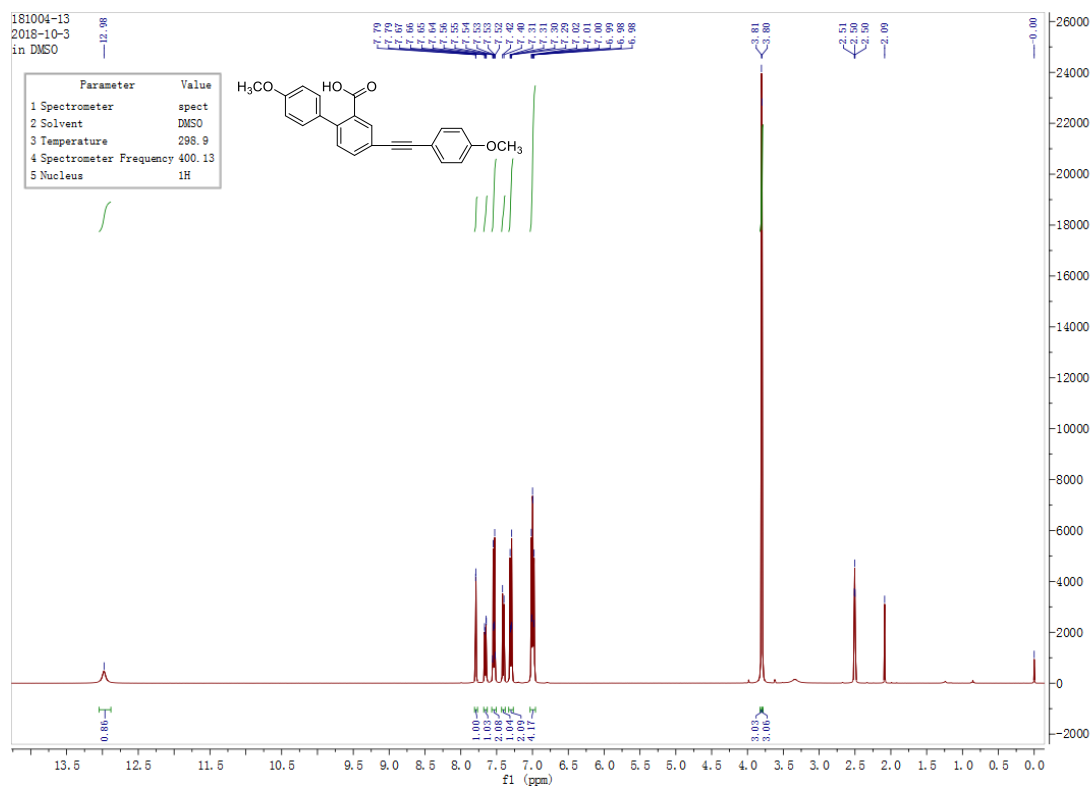

# <sup>13</sup>C NMR Spectra of Compound 2b

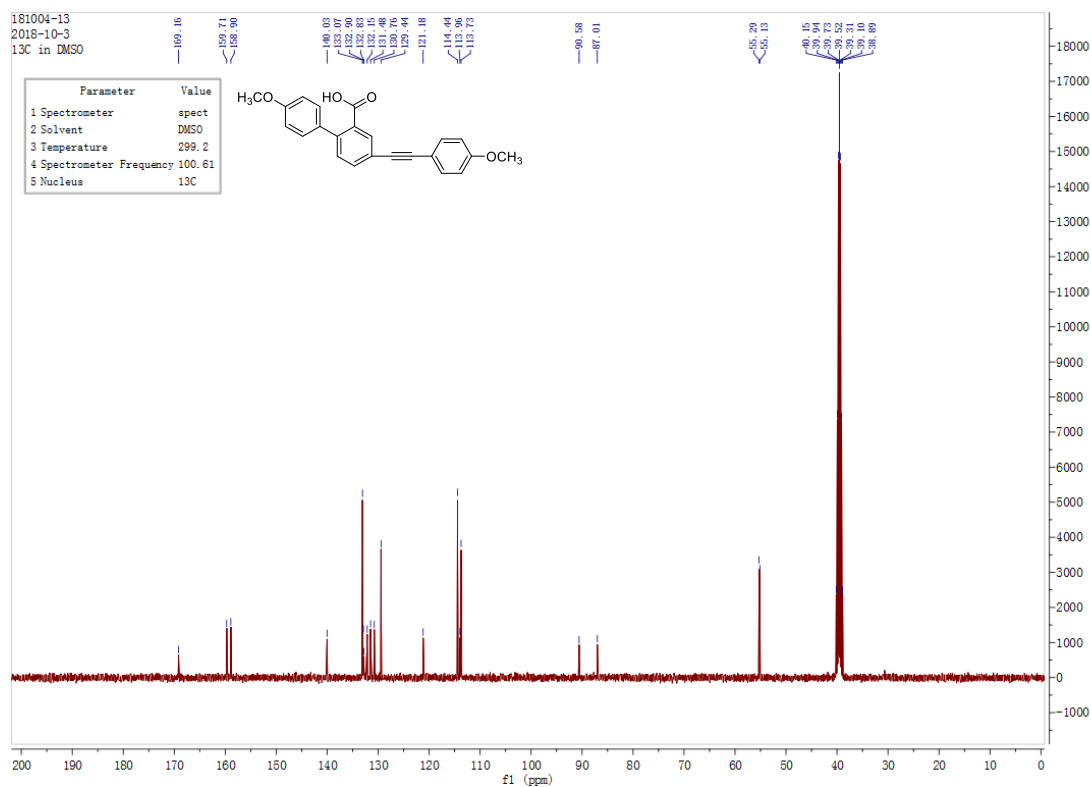

### <sup>1</sup>H NMR Spectra of Compound 2c

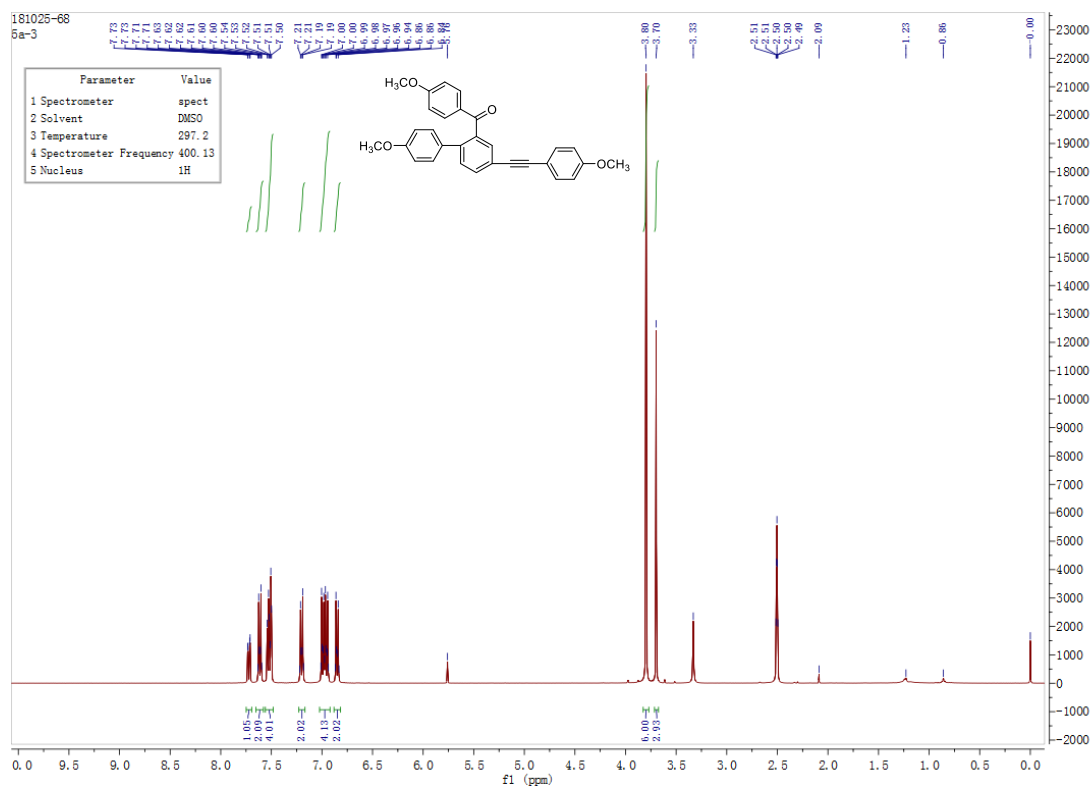

### <sup>13</sup>C NMR Spectra of Compound 2c

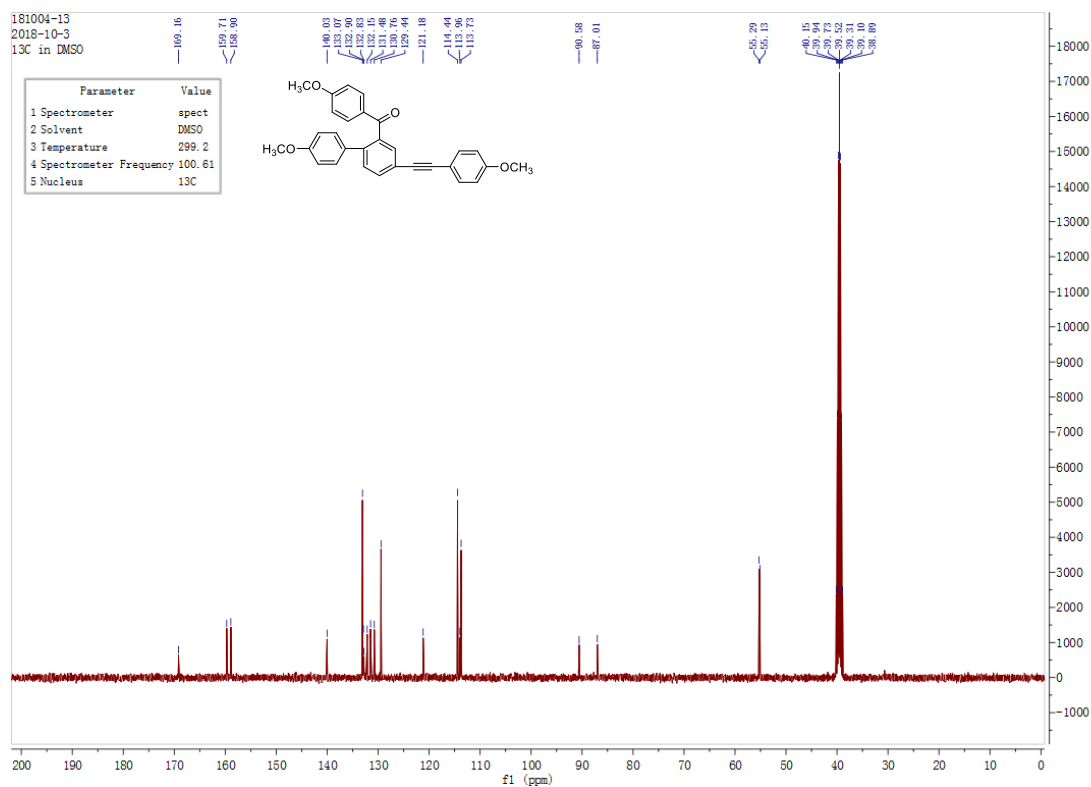

### <sup>1</sup>H NMR Spectra of Compound 2d

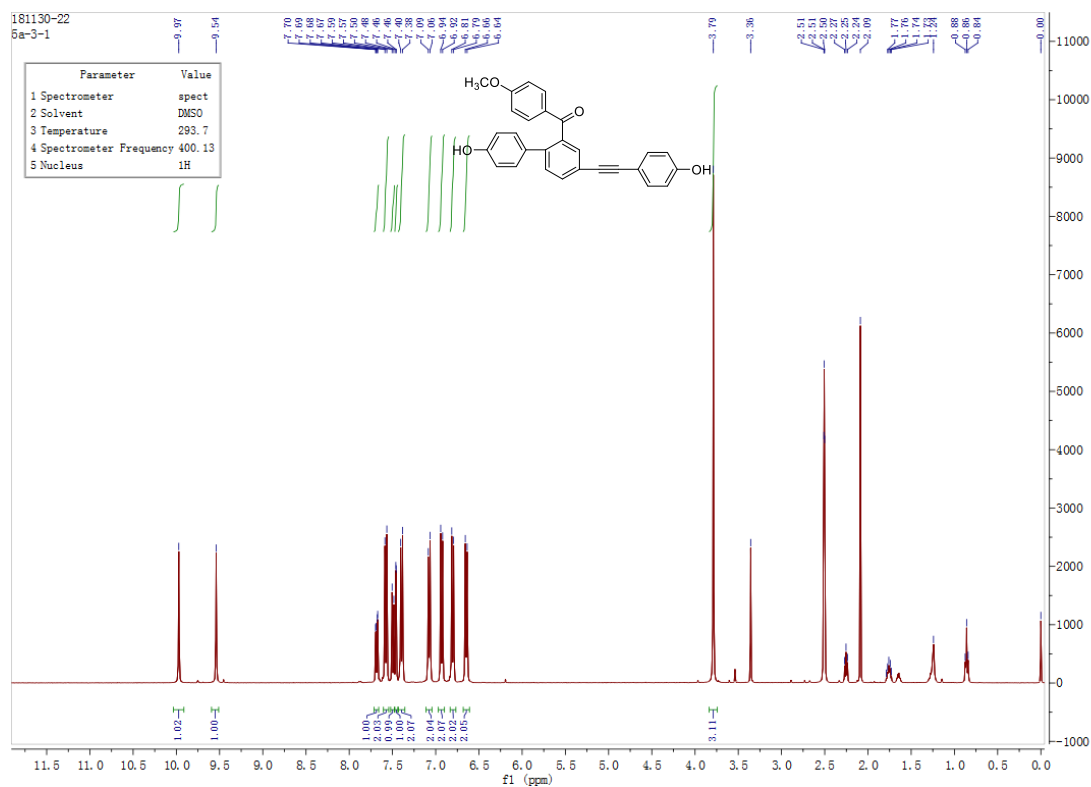

### <sup>13</sup>C NMR Spectra of Compound 2d

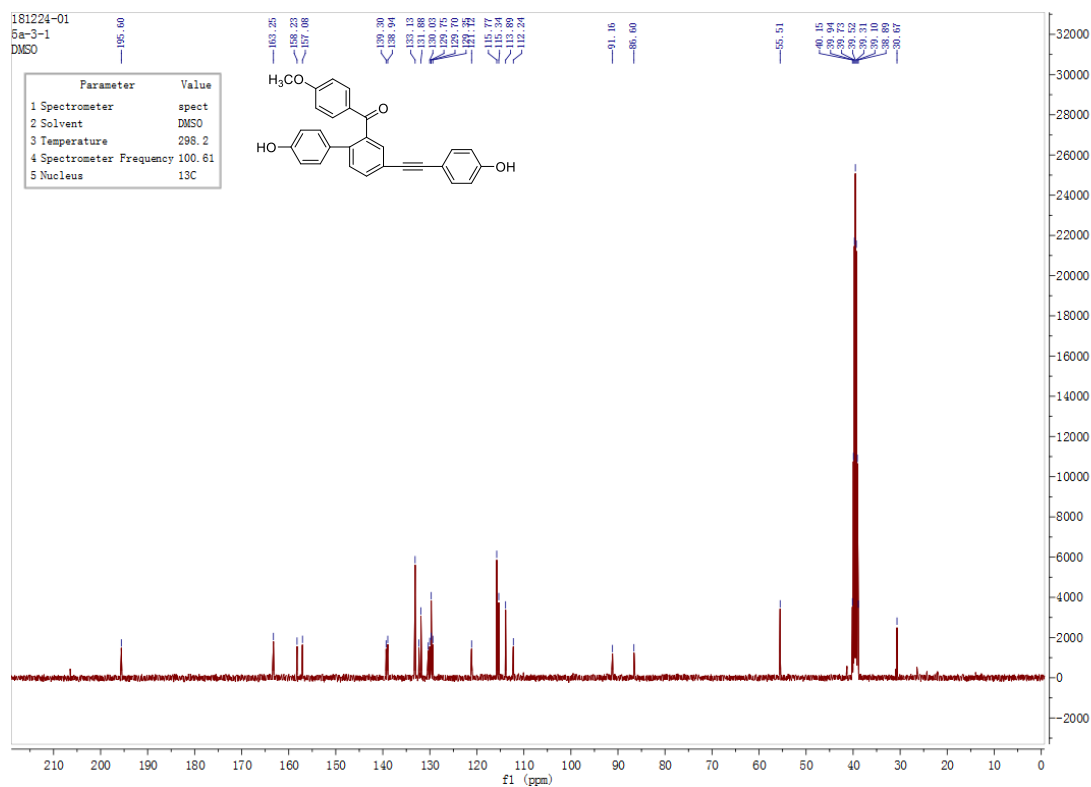

### <sup>1</sup>H NMR Spectra of Compound 2e

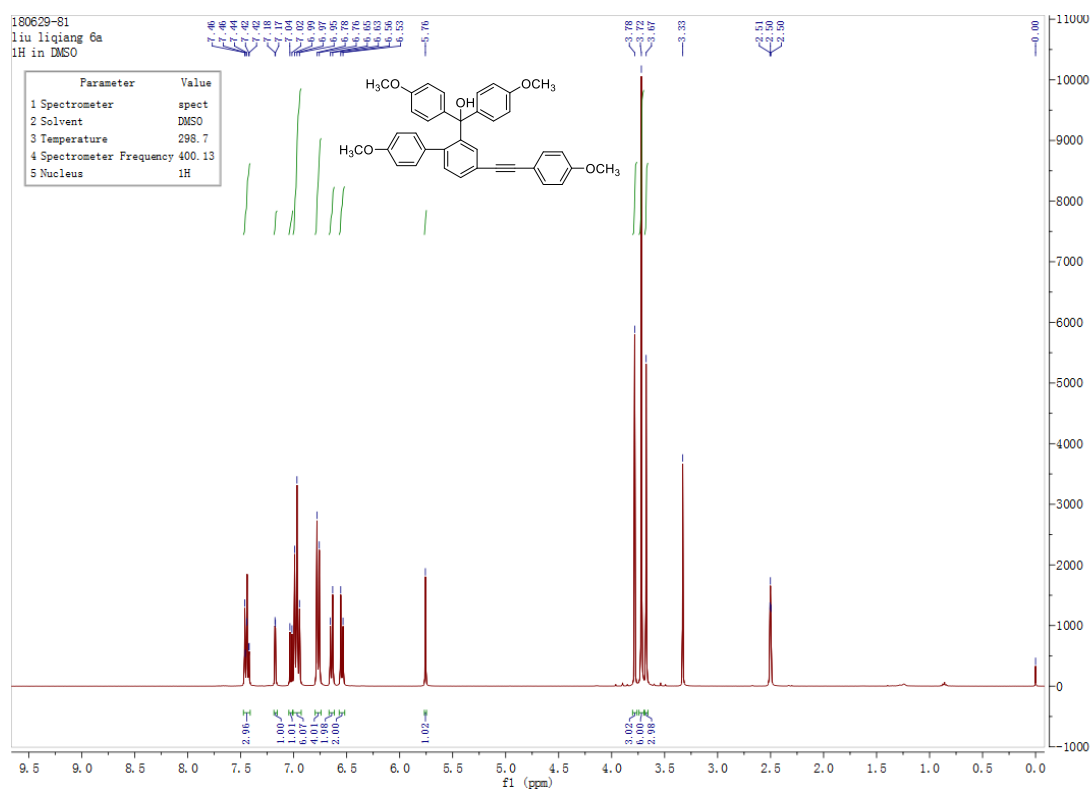

### <sup>13</sup>C NMR Spectra of Compound 2e

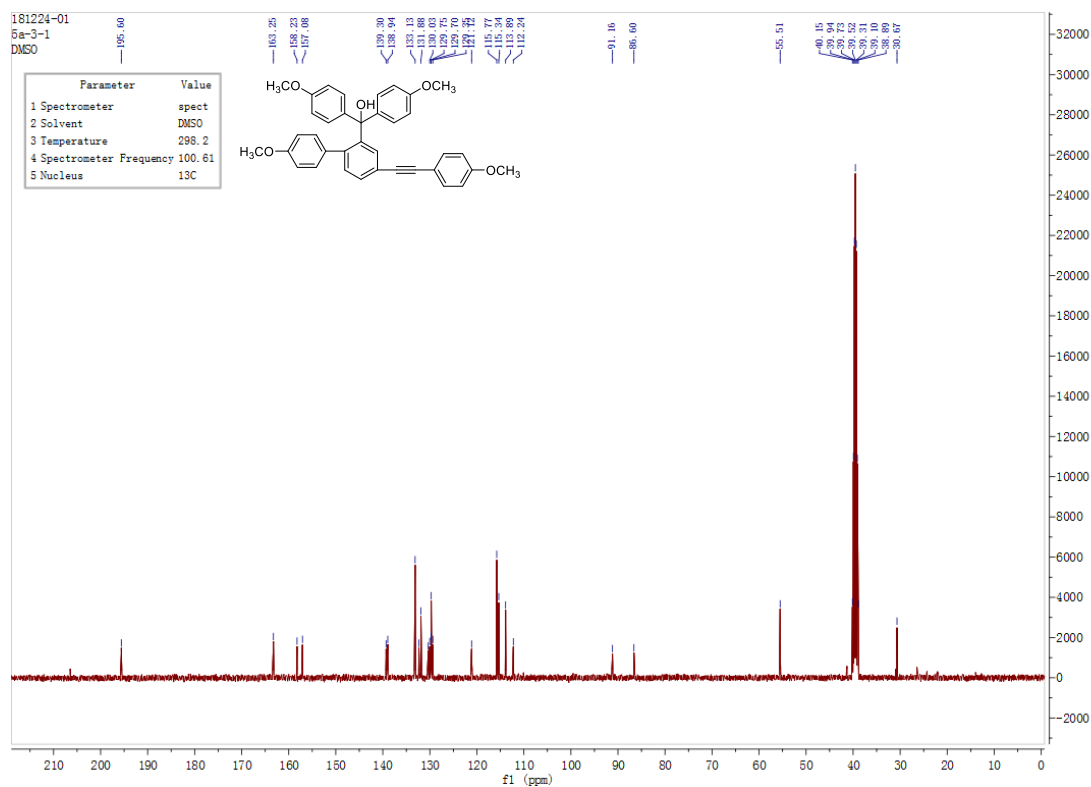



### <sup>1</sup>H NMR Spectra of Compound **2g**

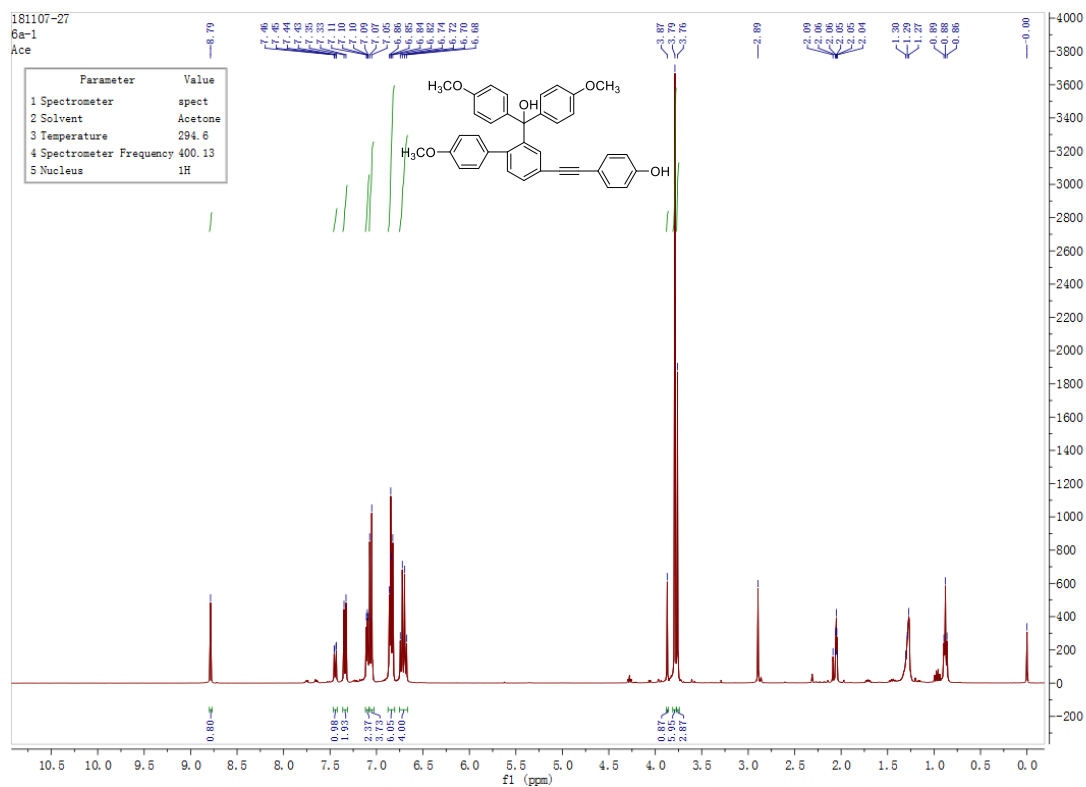

### <sup>13</sup>C NMR Spectra of Compound **2g**

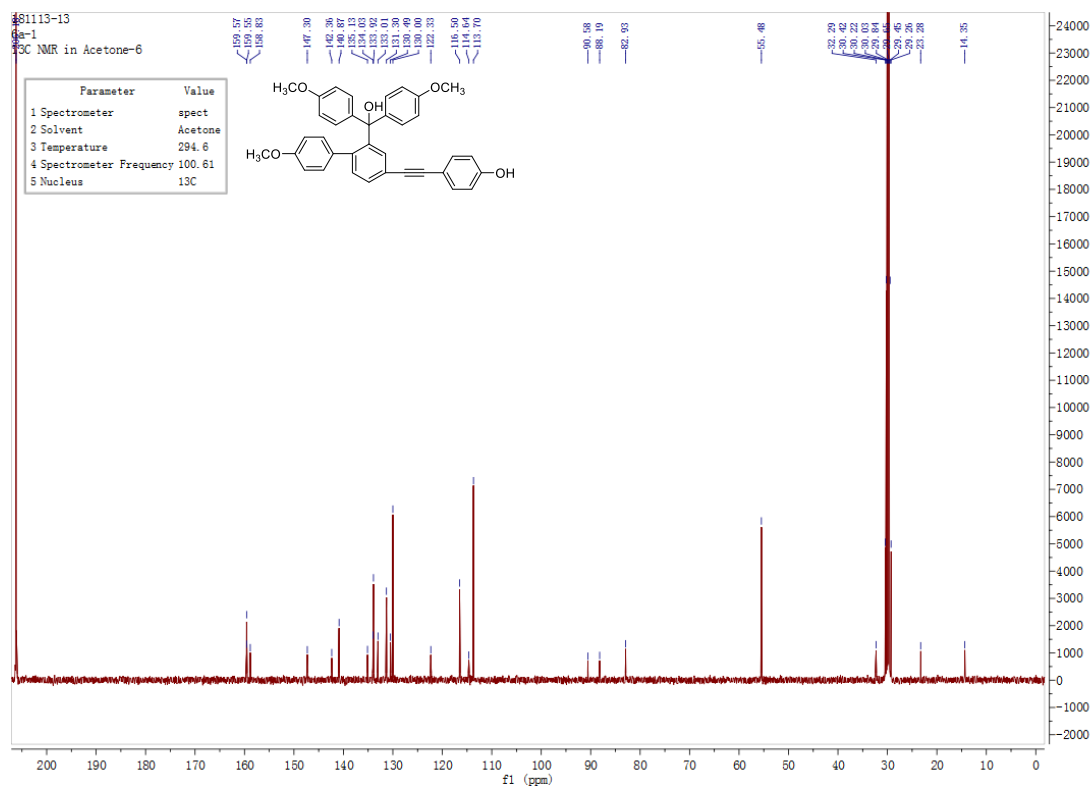



### <sup>1</sup>H NMR Spectra of Compound 2h

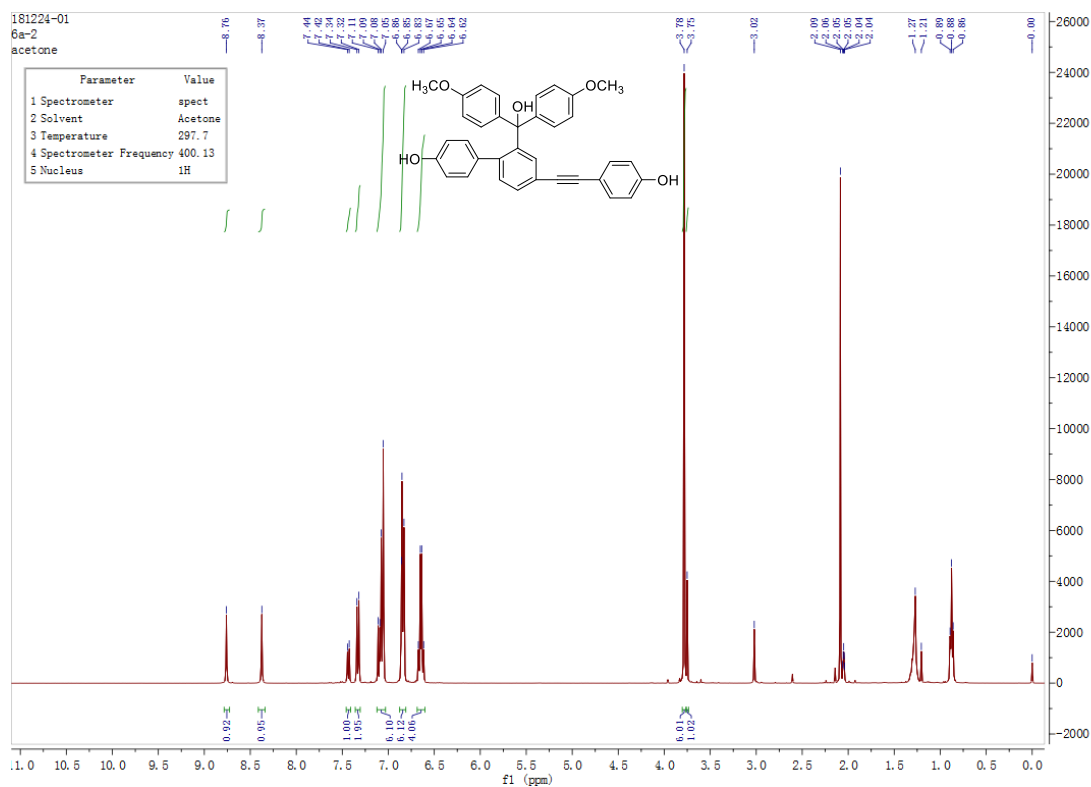

### <sup>13</sup>C NMR Spectra of Compound 2h

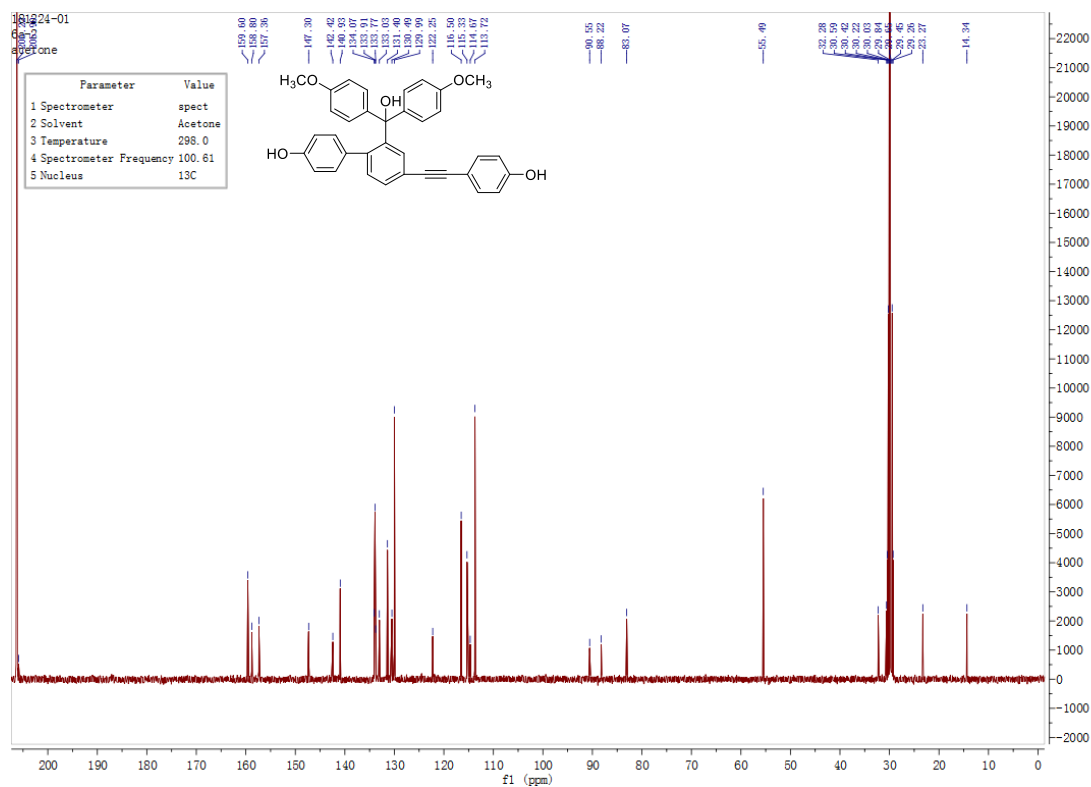

# <sup>1</sup>H NMR Spectra of Compound 2i

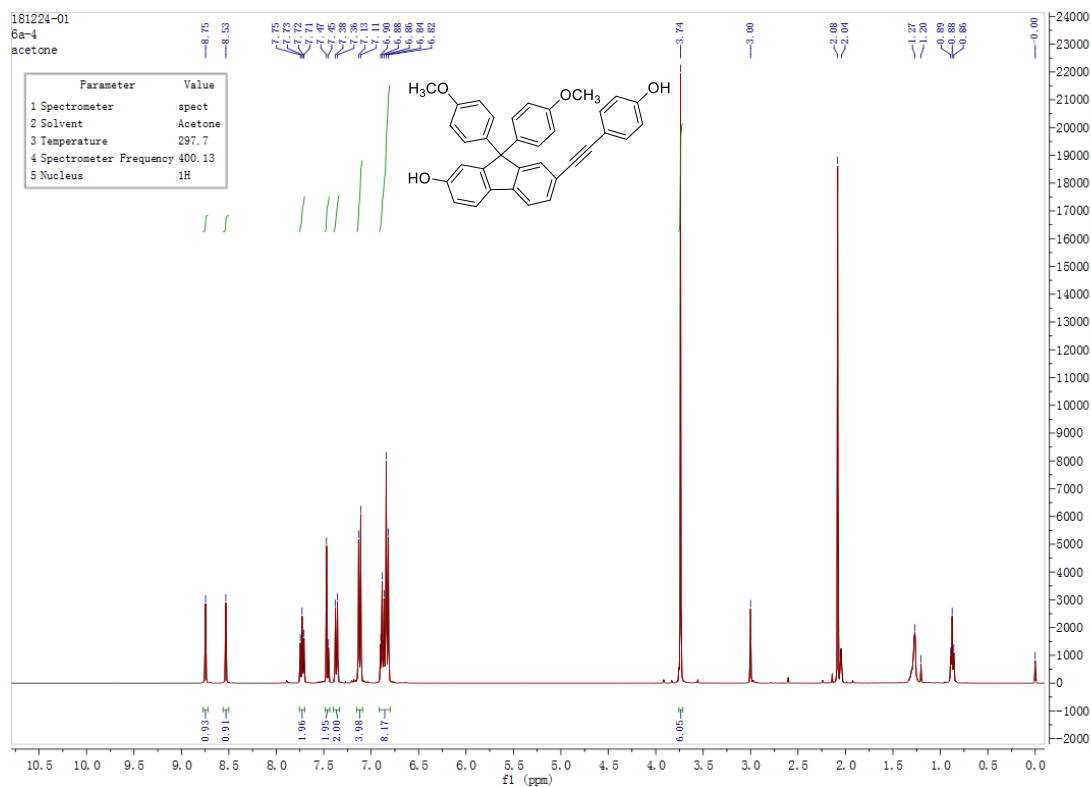

# <sup>13</sup>C NMR Spectra of Compound 2i

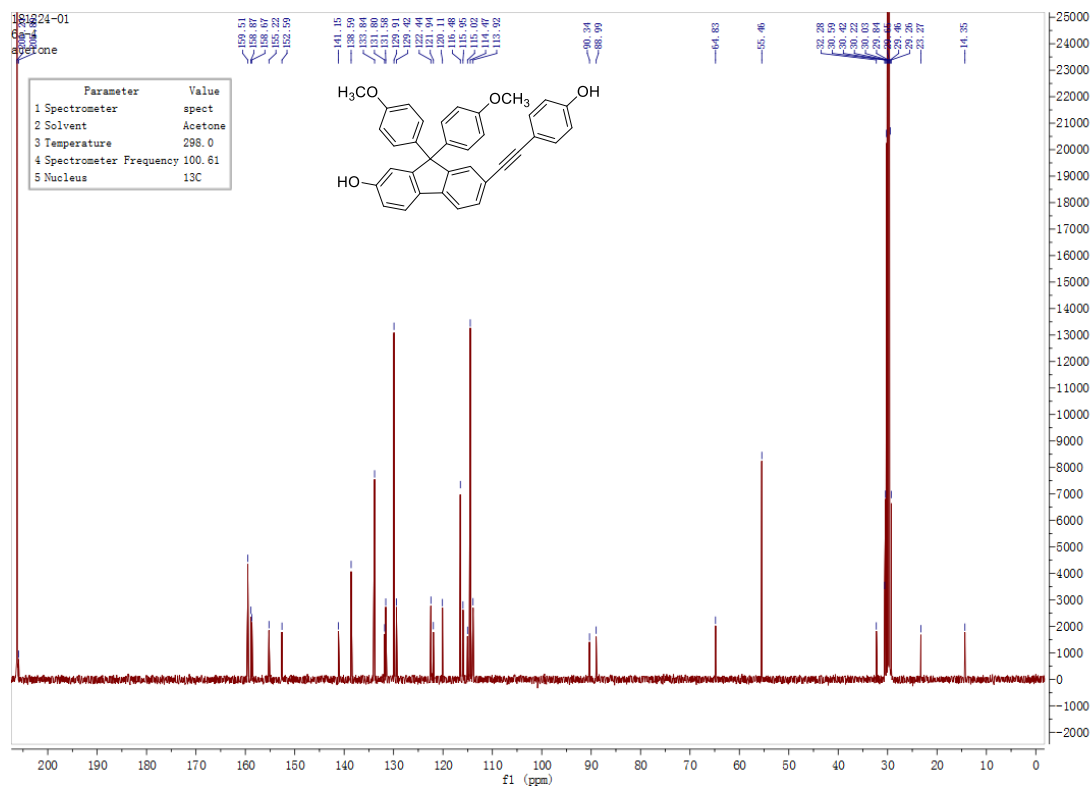

# <sup>1</sup>H NMR Spectra of Compound 2j

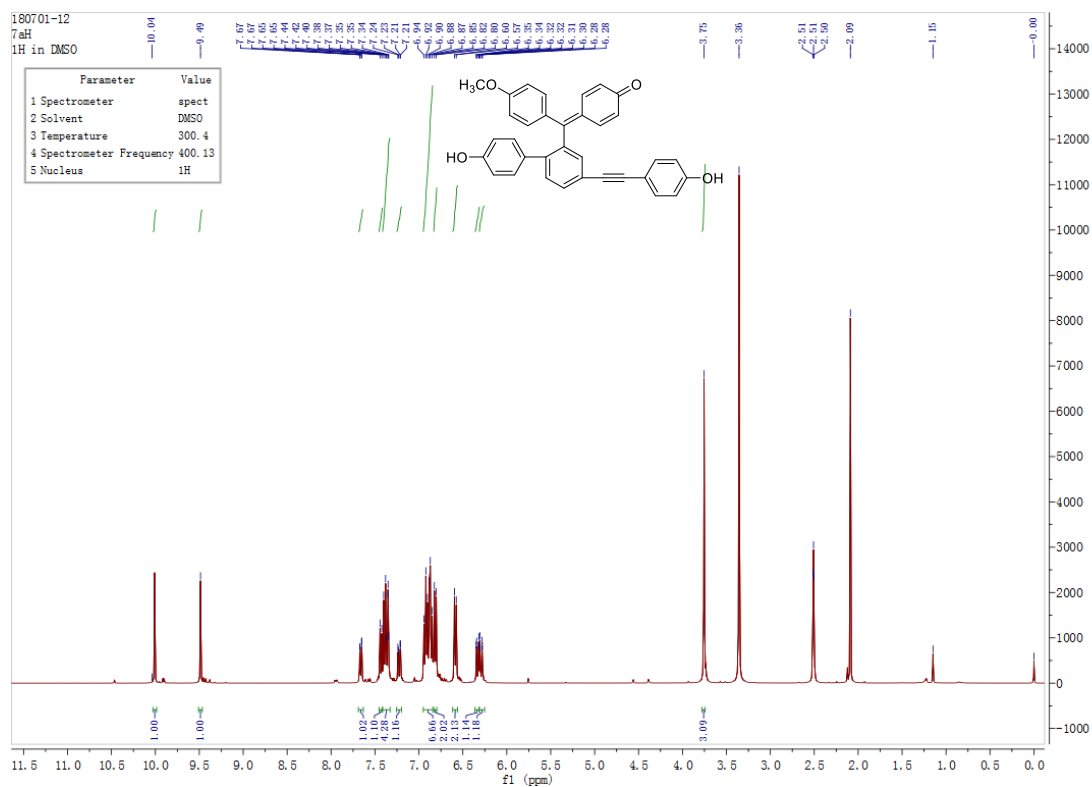

# <sup>13</sup>C NMR Spectra of Compound 2j

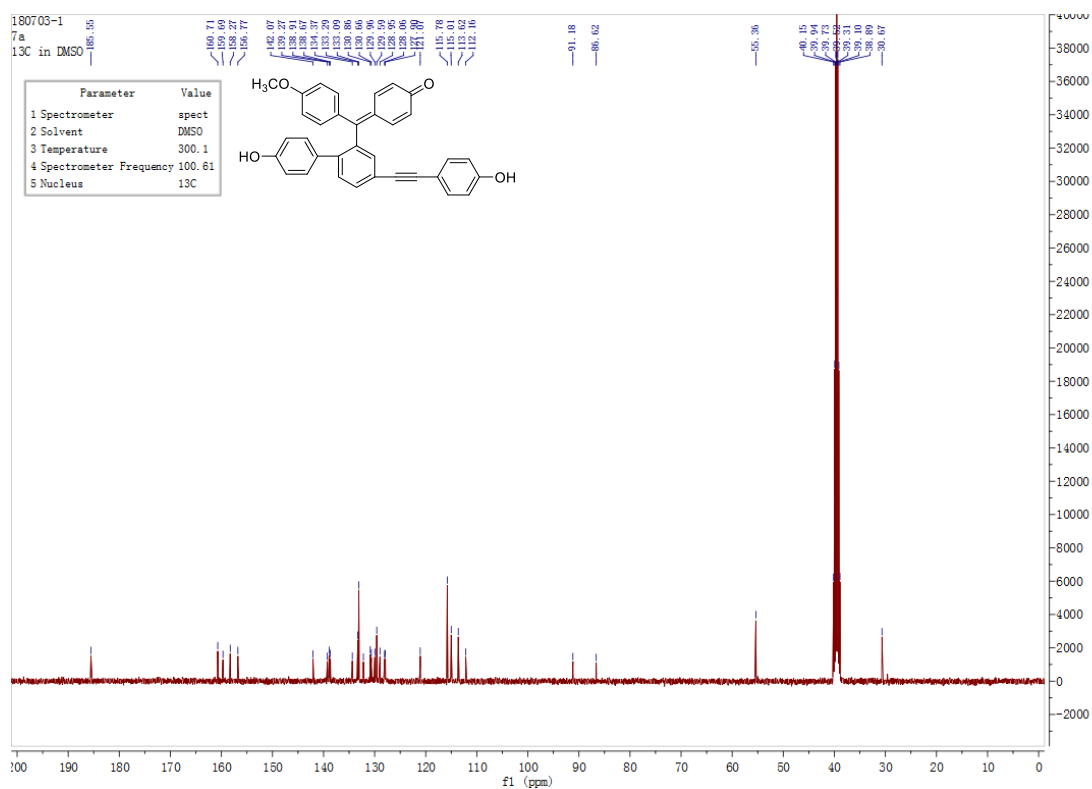

## COSY of Compound 2j

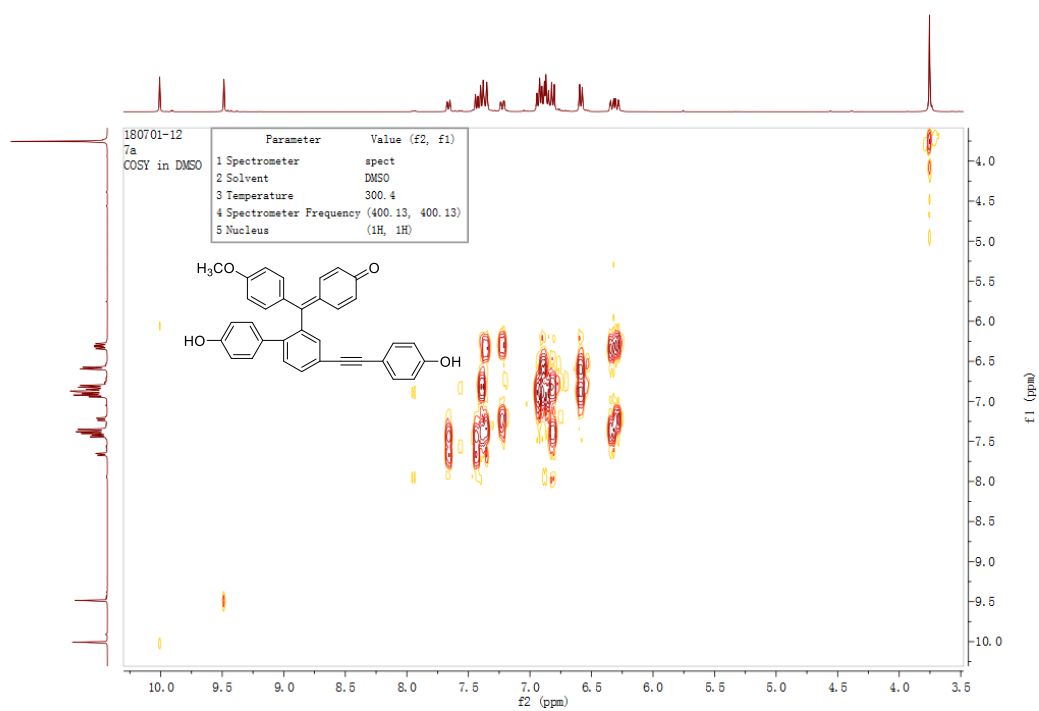

## HSQC of Compound 2j

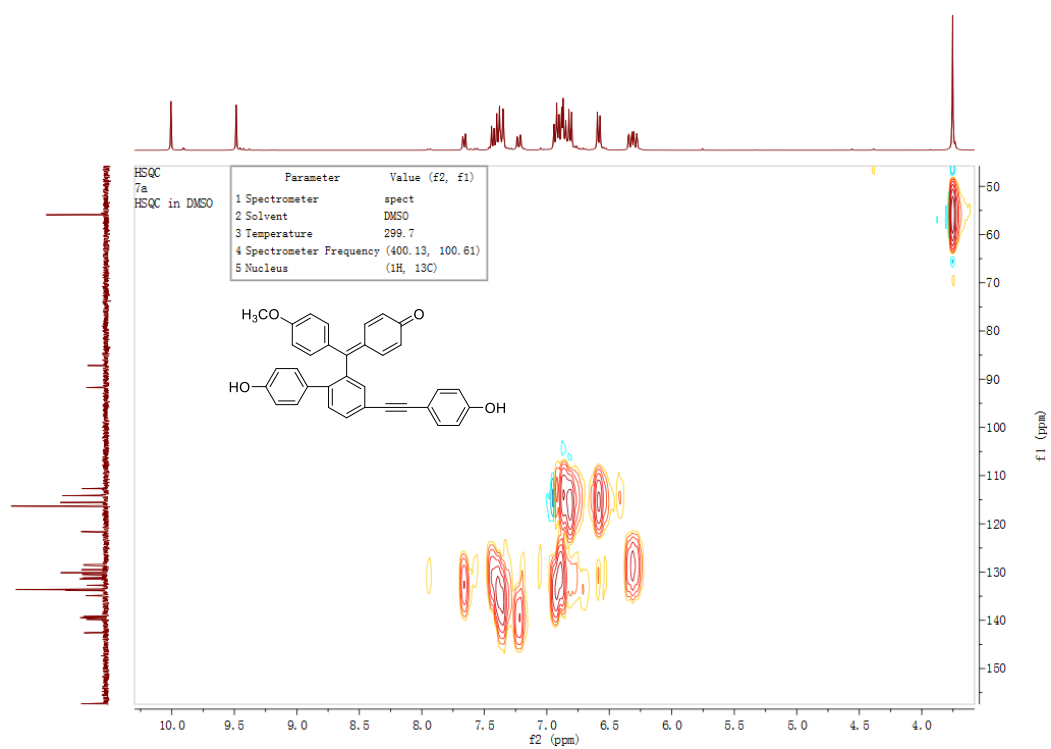

# HMBC of Compound 2j

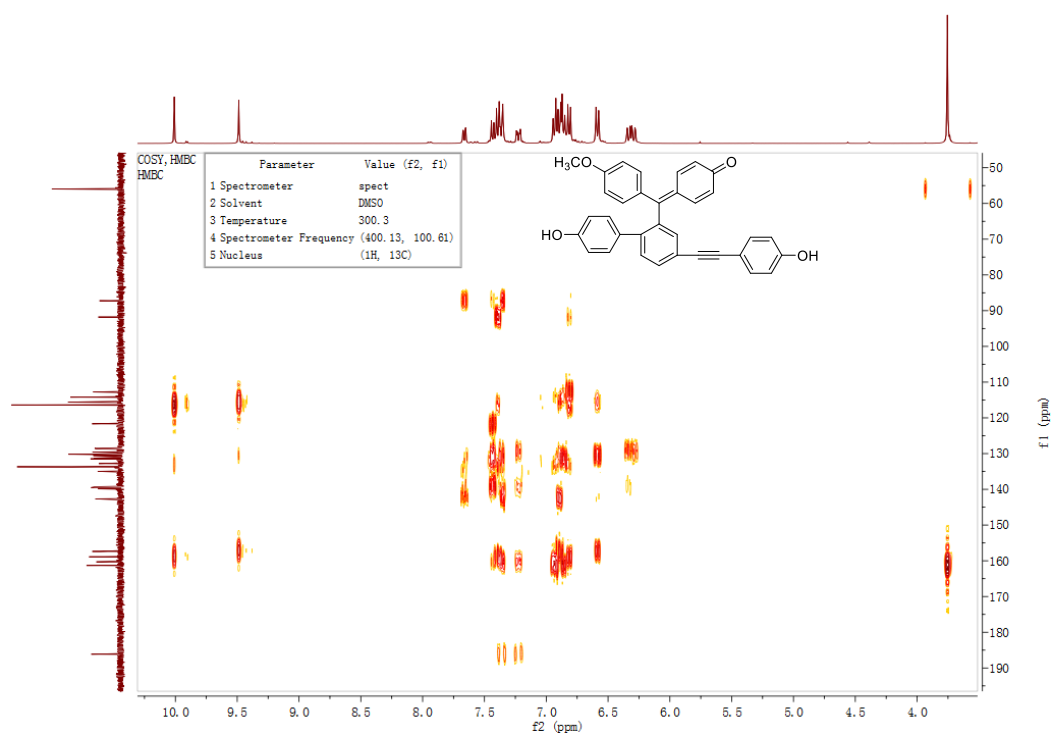

Supplement: c9ra02525a1.pdf [file c9ra02525a1.pdf]
